# Supplementary material for: Characterization of black carbon aerosols over Indian Antarctic station, Maitri and identification of potential source areas
Source: Royal Society of Chemistry journal article supplement (doi:10.1039/d1ea00024a), 2021-01-01

Supporting Information

Figure S1: Daily mean BC concentration

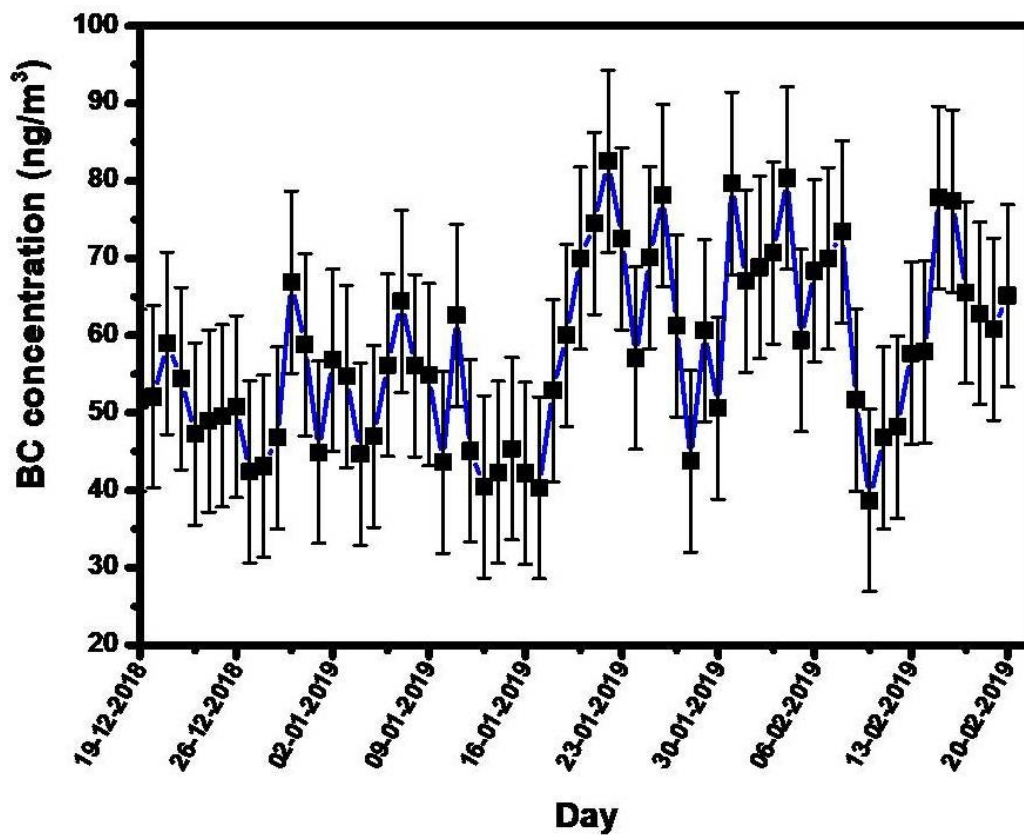

Figure S2: Patagonia contribution of BC aerosols to Maitri

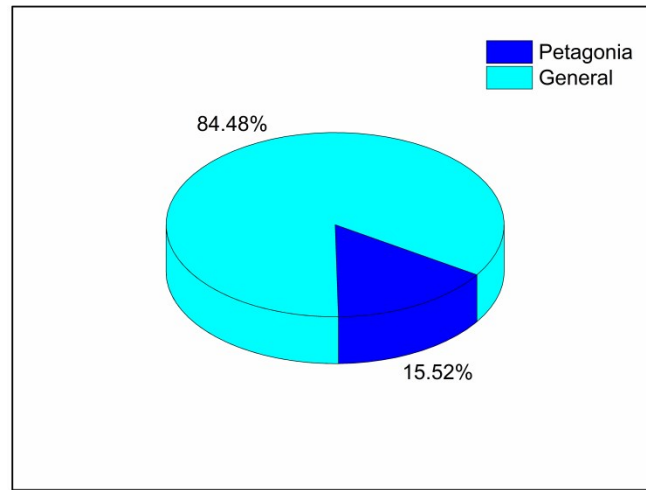

Figure S3: Comparison of BC with (a) wind speed, (b) Temperature, (c) RH and (d) pressure

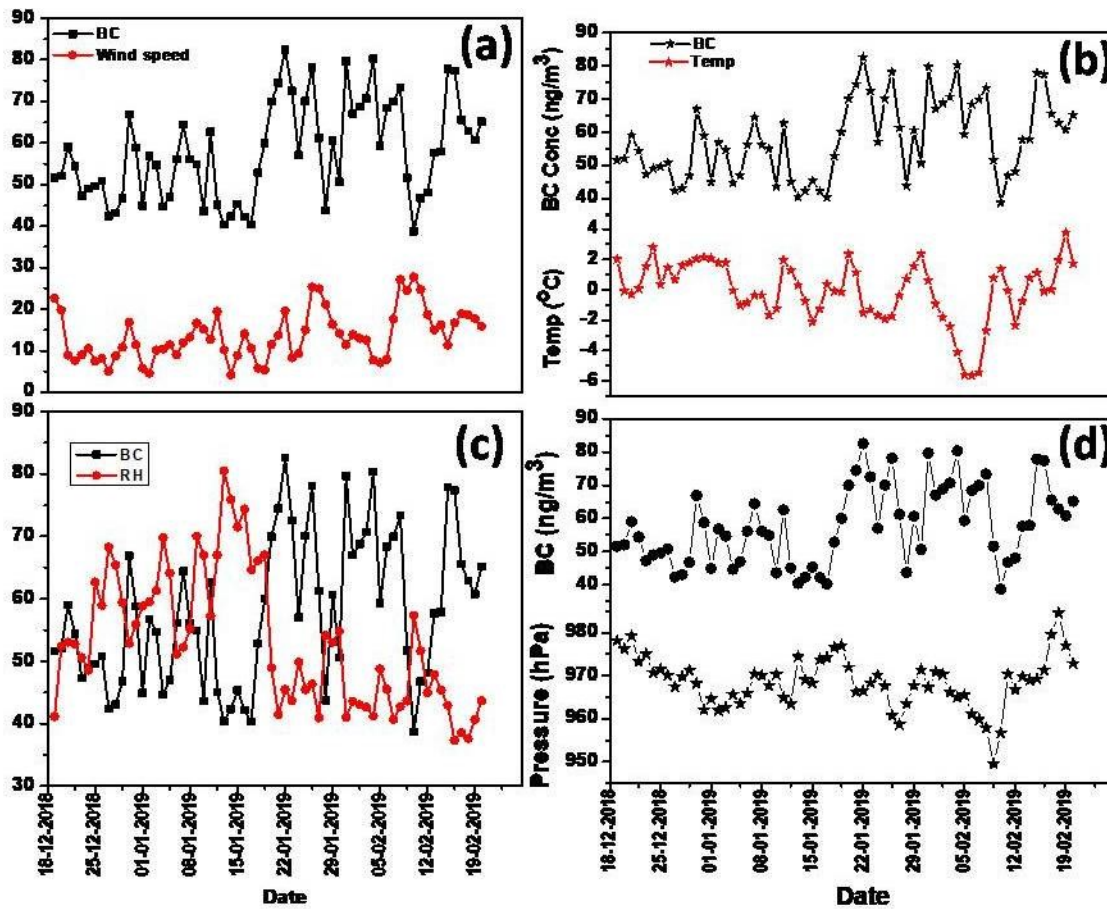

Supplement: d1ea00024a1.pdf [file d1ea00024a1.pdf]
